# Supplementary material
Source: publisher figshare collection journal article supplement (https://acs.figshare.com/ndownloader/files/14023550)
Supplement: Supplementary file 1 [file 14023550]

*Supporting Information:*

**Crowding Effects on Energy Transfer Efficiencies of Hetero-FRET Probes as Measured  
using Time-Resolved Fluorescence Anisotropy**

Hannah Leopold<sup>†</sup>, Ryan Leighton<sup>†</sup>, Jacob Schwarz<sup>†</sup>, Arnold J. Boersma<sup>‡</sup>, Erin D. Sheets<sup>†\*</sup> and  
Ahmed A. Heikal<sup>†\*</sup>

<sup>†</sup> *Department of Chemistry and Biochemistry, Swenson College of Science and Engineering,  
University of Minnesota Duluth, Duluth, MN, USA*

<sup>‡</sup> *DWI-Leibniz Institute for Interactive Materials, Forckenbeckstr.50, 52056 Aachen, Germany.*

\* Corresponding Authors: *Ahmed A. Heikal (aaheikal@d.umn.edu, 218-726-7036); Erin D. Sheets (edsheets@d.umn.edu, 218-726-6046).*

## Supporting Information: Figures

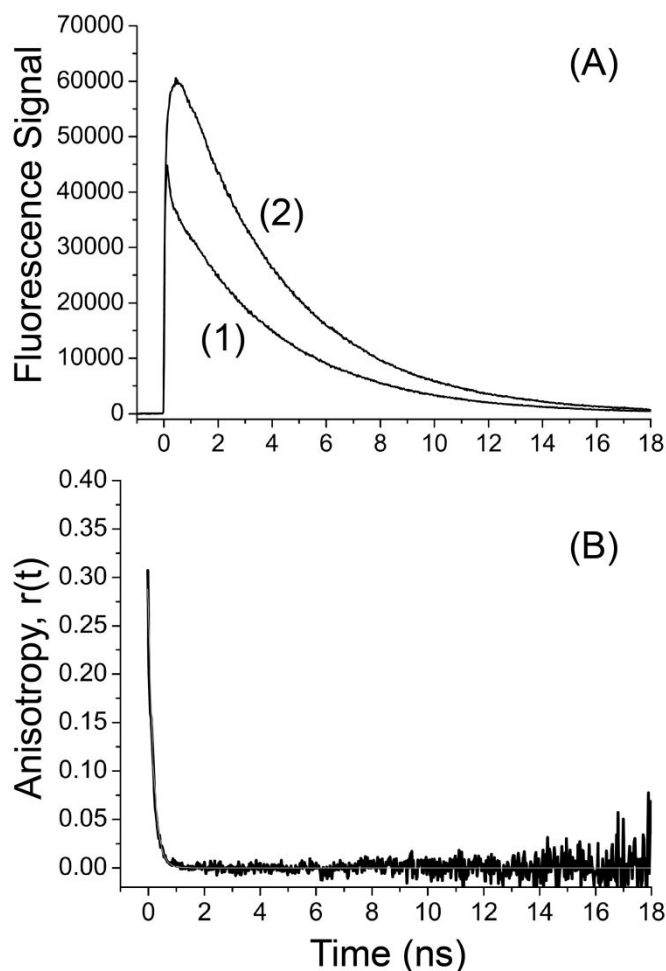

**Figure S1:** Time-resolved fluorescence anisotropy of rhodamine-110 for calibrating the G-factor in our experimental setup. (A) Time-resolved parallel (curve 1) and perpendicular (curve 2) fluorescence of Rh110 (PBS, pH 7.5) were detected simultaneously using SPC-830 module. Rh110 was excited at 425 nm with polarization-analyzed fluorescence that was detected at 531/40 nm. Notice the high signal to noise ratio required for reliable time-resolved anisotropy calculations, particularly for large molecules with a rotational time that significantly longer than the excited-state lifetime (4.0 ns for Rh110). (B) Time-resolved anisotropy of Rh110 (PBS, pH 7.5) reveals a rotational time of 180 ps due to the ester group attached to this reference fluorophore. Our estimated a G-factor of 0.556 using tail-matching approach of the parallel and perpendicular fluorescence decays (Panel A). This control experiment was carried out multiple times during measurements of time-resolved anisotropy of the other hetero-FRET probes.

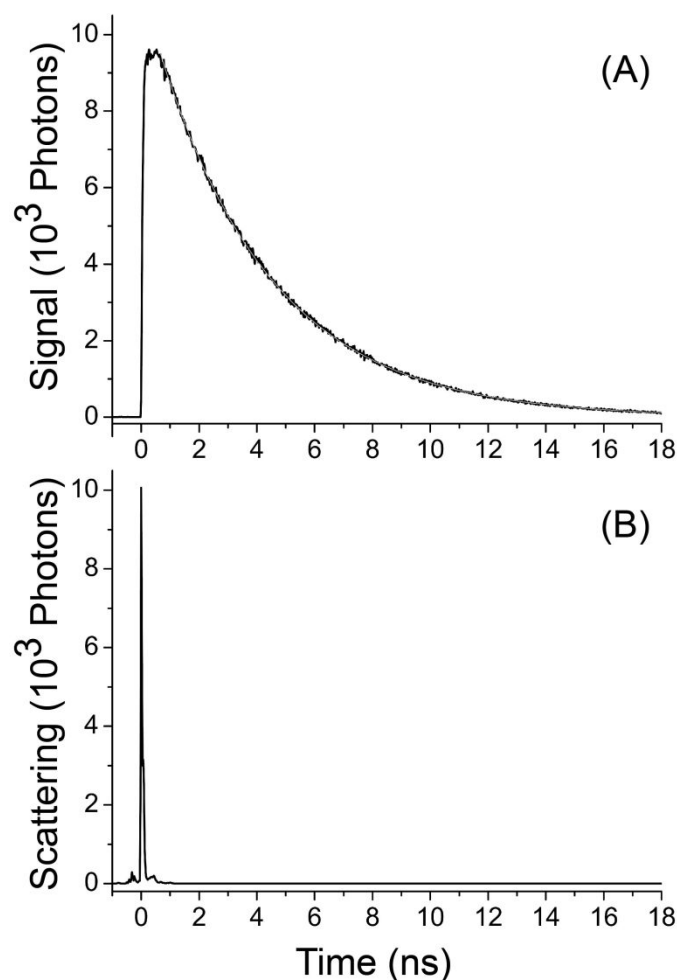

**Figure S2:** Excited-state fluorescence lifetime measurements of the donor in cleaved E6 (PBS, pH 7.5). (A) Time-resolved fluorescence of cleaved E6 (PBS, pH 7.5), which was excited at 425 nm with magic-angle detection at 475/50 nm. The fluorescence decay is shown on a logarithmic scale along with the fitting curve (gray) with an estimated average fluorescence lifetime of  $3.97 \pm 0.04$  ns. (B) The measured system response function (SRF) of our setup has a full width half maximum (FWHM) of 60 ps. The SRF was measured by detecting the scattered light of the laser on a droplet of 2% milk replacing our fluorescent sample. The emission filters were removed from the detection system during the SRF measurements under the same SPC-830 setup and in the presence of the dichroic mirror.

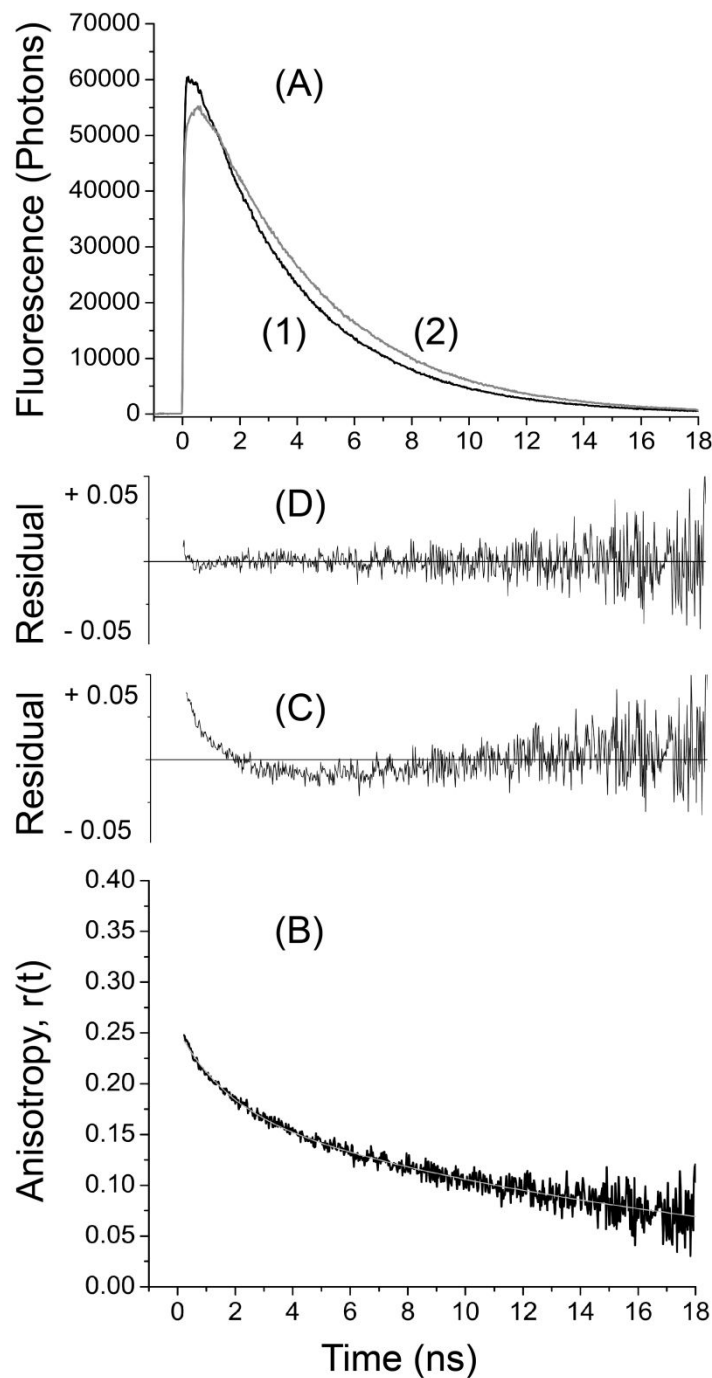

**Figure S.3:** Time-resolved fluorescence anisotropy of intact E6 FRET probe. (A) Typical time-resolved fluorescence of parallel (curve 1) and perpendicular (curve 2) polarizations of intact E6 (PBS, pH 7.5), where the donor was excited at 425 nm and the emission of the acceptor was detected at 531/40 nm. (B) The corresponding time-resolved anisotropy of intact E6 as calculated from (A). (C) The residual of a single-exponential fitting model of the time-resolved anisotropy of intact E6 (PBS) is modulated suggesting inadequate description of the rotational dynamics of E6 under these excitation and detection conditions. (D) The residual of a double exponential fitting model of the time-resolved anisotropy of intact E6 (PBS), with the fitting parameters are  $\beta_1 = 0.08$ ,  $\phi_1 = 1.73$  ns,  $\beta_2 = 0.18$ , and  $\phi_2 = 19.0$  ns. The G-factor was measured daily using Rh110 (Figure S.2) under the same experimental conditions for reliable calibration of our setup during the time-resolved anisotropy measurements of all other hetero-FRET probes.

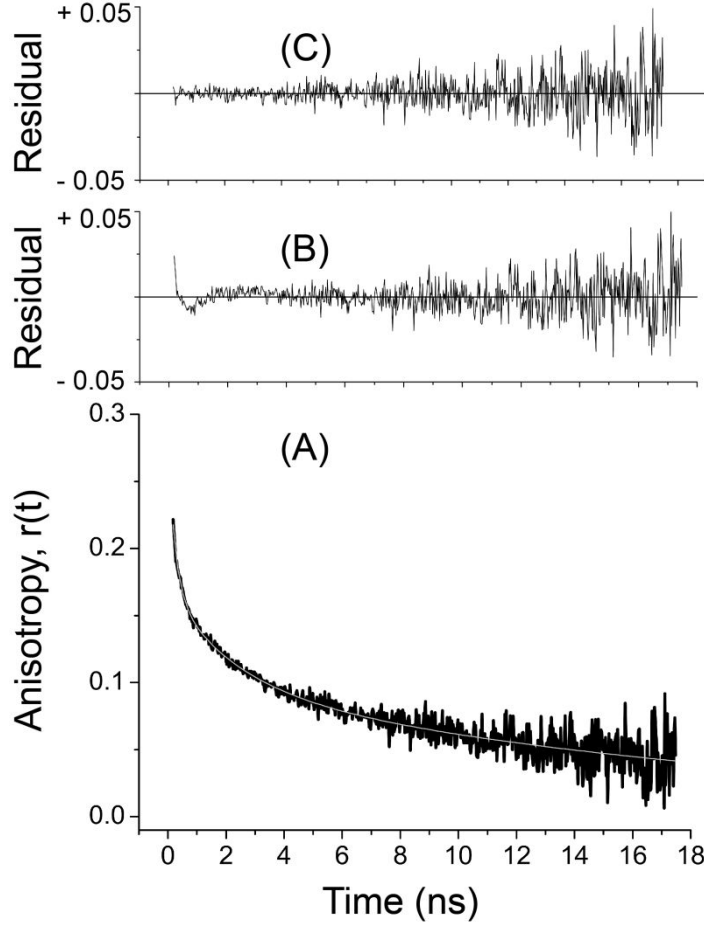

**Figure S4:** Time-resolved fluorescence anisotropy of intact G12 FRET probe. (A) Typical time-resolved anisotropy of intact G12 (PBS, pH 7.5), where the donor was excited at 425 nm and the emission of the acceptor was detected at 531/40 nm. (B) The residual of a double-exponential fitting model of the time-resolved anisotropy of intact G12 (PBS) is modulated suggesting inadequate description of the rotational dynamics of G12 under these excitation and detection conditions. (C) The corresponding residual of a triple-exponential fitting model of the time-resolved anisotropy of intact G12 (PBS) with  $\beta_1 = 0.11$ ,  $\varphi_1 = 0.25$  ns,  $\beta_2 = 0.07$ ,  $\varphi_2 = 2.19$  ns,  $\beta_3 = 0.10$ , and  $\varphi_3 = 19.8$  ns. Similar trend was observed for G18 FRET probe with  $\beta_1 = 0.08$ ,  $\varphi_1 = 0.24$  ns,  $\beta_2 = 0.07$ ,  $\varphi_2 = 1.94$  ns,  $\beta_3 = 0.12$ , and  $\varphi_3 = 18.1$  ns, under the same experimental conditions.

## Supporting Information: Tables

**Table S1:** Fitting parameters of the wavelength-dependent time-resolved fluorescence anisotropy of intact and cleaved E6 probe (PBS, pH 7.4). The angle ( $\theta$ ) between the absorbing and emitting dipoles is also calculated using the initial anisotropy ( $r_0$ ).

| $\lambda_x - \lambda_{fl}$ :<br>Probe | $\beta_1$ | $\varphi_1$<br>(ns) | $\beta_2$ | $\varphi_2$<br>(ns) | $r_0$ | $\theta$ |
|---------------------------------------|-----------|---------------------|-----------|---------------------|-------|----------|
| <b>425 – 475/50:</b>                  |           |                     |           |                     |       |          |
| Intact E6                             | —         | —                   | 0.280     | 17.8                | 0.280 | 46.6°    |
| Cleaved E6                            | —         | —                   | 0.287     | 13.3                | 0.287 | 46.3°    |
| <b>425 – 531/40:</b>                  |           |                     |           |                     |       |          |
| Intact E6                             | 0.074     | 1.47                | 0.184     | 18.0                | 0.258 | 47.8°    |
| Cleaved E6                            | —         | —                   | 0.283     | 14.1                | 0.283 | 46.5     |
| <b>465 – 531/40:</b>                  |           |                     |           |                     |       |          |
| Intact E6                             | 0.058     | 1.95                | 0.197     | 19.3                | 0.255 | 47.9°    |
| Cleaved E6                            | —         | —                   | 0.280     | 14.9                | 0.280 | 46.6°    |

**Table (S2):** Fitting parameters of the E6 FRET probe (excited at 425 nm and detected at 531/40 nm) in Ficoll-70 and glycerol solutions (in PBS). The calculated energy transfer rates ( $k_{ET}$ ), the apparent energy transfer efficiencies (E), and the donor-acceptor distances ( $R_{DA}$ ) are also shown.

| Environment<br>(PBS) | $\beta_1$ | $\phi_1$<br>(ns) | $\beta_2$ | $\phi_2$<br>(ns) | $\tau_D$<br>(ns) | $k_{ET}$<br>(ns <sup>-1</sup> ) | E <sup>a</sup><br>(%) | $R_{DA}$<br>(nm) |
|----------------------|-----------|------------------|-----------|------------------|------------------|---------------------------------|-----------------------|------------------|
| Ficoll:              |           |                  |           |                  |                  |                                 |                       |                  |
| 0 g/L                | 0.074     | 1.47             | 0.184     | 17.96            | 3.98             | 0.625                           | 20.5                  | 6.60             |
| 100 g/L              | 0.078     | 1.57             | 0.159     | 26.49            | 3.91             | 0.599                           | 23.1                  | 6.40             |
| 200 g/L              | 0.085     | 1.51             | 0.144     | 49.61            | 3.81             | 0.642                           | 26.3                  | 6.19             |
| 300 g/L              | 0.086     | 1.12             | 0.142     | 78.22            | 3.74             | 0.880                           | 28.9                  | 5.97             |
| Glycerol:            |           |                  |           |                  |                  |                                 |                       |                  |
| 0 g/L                | 0.074     | 1.47             | 0.184     | 17.96            | 3.98             | 0.625                           | 20.5                  | 6.60             |
| 340 g/L              | 0.068     | 1.32             | 0.2       | 35.01            | 3.73             | 0.729                           | 18.6                  | 6.64             |
| 480 g/L              | 0.072     | 1.9              | 0.2       | 64.46            | 3.61             | 0.511                           | 17.2                  | 6.68             |
| 620 g/L              | 0.075     | 1.74             | 0.205     | 91.12            | 3.50             | 0.564                           | 17.8                  | 6.57             |
| 760 g/L              | 0.075     | 2.23             | 0.202     | 183.24           | 3.34             | 0.443                           | 16.2                  | 6.66             |

**Table (S3):** Fitting parameters of the GE FRET probe (excited at 425 nm and detected at 531/40 nm) in Ficoll-70 and glycerol solutions (in PBS). The calculated energy transfer rate, the apparent energy transfer efficiencies, and the donor-acceptor distance are also shown.

| Environment<br>(PBS) | $\beta_1$ | $\phi_1$<br>(ns) | $\beta_2$ | $\phi_2$<br>(ns) | $\tau_D$<br>(ns) | $k_{ET}$<br>(ns <sup>-1</sup> ) | $E^a$<br>(%) | $R_{DA}$<br>(nm) |
|----------------------|-----------|------------------|-----------|------------------|------------------|---------------------------------|--------------|------------------|
| Ficoll:              |           |                  |           |                  |                  |                                 |              |                  |
| 0 g/L                | 0.055     | 1.7              | 0.212     | 18.06            | 3.99             | 0.533                           | 14.0         | 7.12             |
| 100 g/L              | 0.064     | 1.68             | 0.189     | 27.78            | 3.89             | 0.559                           | 17.3         | 6.79             |
| 200 g/L              | 0.069     | 1.38             | 0.18      | 51.29            | 3.82             | 0.705                           | 20.2         | 6.55             |
| 300 g/L              | 0.069     | 1.43             | 0.177     | 101.05           | 3.75             | 0.689                           | 20.2         | 6.46             |
| Glycerol:            |           |                  |           |                  |                  |                                 |              |                  |
| 0 g/L                | 0.055     | 1.7              | 0.212     | 18.06            | 3.99             | 0.533                           | 14.0         | 7.12             |
| 340 g/L              | 0.051     | 2.28             | 0.222     | 44.72            | 3.74             | 0.416                           | 11.4         | 7.30             |
| 480 g/L              | 0.050     | 2.23             | 0.231     | 74.54            | 3.63             | 0.435                           | 10.9         | 7.29             |
| 620 g/L              | 0.047     | 2.08             | 0.236     | 100.36           | 3.52             | 0.471                           | 10.4         | 7.29             |
| 760 g/L              | 0.045     | 2.42             | 0.243     | 150.67           | 3.35             | 0.407                           | 9.0          | 7.44             |



**Table (S4):** Fitting parameters of the G18 FRET probe (excited at 425 nm and detected at 531/40 nm) in Ficoll-70 and glycerol solutions (in PBS). The calculated energy transfer rates, the apparent energy transfer efficiencies, and the donor-acceptor distances are also shown.

| Environment<br>(PBS) | $\beta_1$ | $\phi_1$<br>(ns) | $\beta_2$ | $\phi_2$<br>(ns) | $\tau_D$<br>(ns) | $k_{ET}$<br>(ns <sup>-1</sup> ) | $E^a$<br>(%) | $R_{DA}$<br>(nm) |
|----------------------|-----------|------------------|-----------|------------------|------------------|---------------------------------|--------------|------------------|
| Ficoll:              |           |                  |           |                  |                  |                                 |              |                  |
| 0 g/L                | 0.092     | 1.06             | 0.129     | 16.2             | 3.97             | 0.882                           | 32.4         | 5.95             |
| 100 g/L              | 0.096     | 1.21             | 0.105     | 32.21            | 3.89             | 0.795                           | 36.1         | 5.76             |
| 200 g/L              | 0.095     | 1.14             | 0.104     | 65.47            | 3.79             | 0.862                           | 36.5         | 5.71             |
| 300 g/L              | 0.100     | 1.18             | 0.097     | $\infty$         | 3.72             | 0.847                           | 38.5         | 5.55             |
| Glycerol:            |           |                  |           |                  |                  |                                 |              |                  |
| 0 g/L                | 0.092     | 1.06             | 0.129     | 16.2             | 3.97             | 0.882                           | 32.4         | 5.95             |
| 340 g/L              | 0.095     | 1.36             | 0.133     | 42               | 3.71             | 0.711                           | 30.2         | 5.96             |
| 480 g/L              | 0.102     | 1.24             | 0.131     | 84.96            | 3.59             | 0.795                           | 32.4         | 5.81             |
| 620 g/L              | 0.103     | 1.35             | 0.136     | 136.25           | 3.44             | 0.733                           | 30.9         | 5.82             |
| 760 g/L              | 0.101     | 1.47             | 0.145     | 218.96           | 3.30             | 0.676                           | 28.3         | 5.91             |

**Table (S5):** Fitting parameters of the E6G2 FRET probe (excited at 425 nm and detected at 531/40 nm) in Ficoll-70 and glycerol solutions (in PBS). The calculated energy transfer rates, the apparent energy transfer efficiencies, and the donor-acceptor distances are also shown.

| Environment<br>(PBS) | $\beta_1$ | $\phi_1$<br>(ns) | $\beta_2$ | $\phi_2$<br>(ns) | $\tau_D$<br>(ns) | $k_{ET}$<br>(ns <sup>-1</sup> ) | $E^a$<br>(%) | $R_{DA}$<br>(nm) |
|----------------------|-----------|------------------|-----------|------------------|------------------|---------------------------------|--------------|------------------|
| Ficoll:              |           |                  |           |                  |                  |                                 |              |                  |
| 0 g/L                | 0.068     | 1.28             | 0.194     | 18.83            | 3.99             | 0.728                           | 19.3         | 6.68             |
| 100 g/L              | 0.073     | 1.39             | 0.181     | 26.88            | 3.91             | 0.682                           | 20.9         | 6.54             |
| 200 g/L              | 0.079     | 1.2              | 0.162     | 47.65            | 3.83             | 0.812                           | 24.8         | 6.27             |
| 300 g/L              | 0.084     | 1.04             | 0.149     | 120.01           | 3.75             | 0.953                           | 28.2         | 6.00             |
| Glycerol:            |           |                  |           |                  |                  |                                 |              |                  |
| 0 g/L                | 0.068     | 1.28             | 0.194     | 18.83            | 3.99             | 0.728                           | 19.3         | 6.68             |
| 340 g/L              | 0.065     | 1.52             | 0.212     | 45.81            | 3.73             | 0.636                           | 16.5         | 6.79             |
| 480 g/L              | 0.066     | 1.57             | 0.213     | 79.73            | 3.61             | 0.624                           | 16.4         | 6.74             |
| 620 g/L              | 0.064     | 1.5              | 0.22      | 108.23           | 3.475            | 0.657                           | 15.7         | 6.73             |
| 760 g/L              | 0.065     | 1.88             | 0.227     | 159.21           | 3.31             | 0.526                           | 14.1         | 6.84             |

**Table (S6):** Fitting parameters of the G12 FRET probe (excited at 425 nm and detected at 531/40 nm) in Ficoll-70 and glycerol solutions (in PBS). The calculated energy transfer rates, the apparent energy transfer efficiencies, and the donor-acceptor distances are also shown.

| Environment<br>(PBS) | $\beta_1$ | $\phi_1$<br>(ns) | $\beta_2$ | $\phi_2$<br>(ns) | $\tau_D$<br>(ns) | $k_{ET}$<br>(ns <sup>-1</sup> ) | $E^a$<br>(%) | $R_{DA}$<br>(nm) |
|----------------------|-----------|------------------|-----------|------------------|------------------|---------------------------------|--------------|------------------|
| Ficoll:              |           |                  |           |                  |                  |                                 |              |                  |
| 0 g/L                | 0.099     | 1.06             | 0.114     | 16.57            | 3.98             | 0.883                           | 36.2         | 5.78             |
| 100 g/L              | 0.101     | 1.17             | 0.104     | 28.15            | 3.88             | 0.819                           | 37.5         | 5.70             |
| 200 g/L              | 0.101     | 1.11             | 0.097     | 47.04            | 3.81             | 0.880                           | 39.3         | 5.60             |
| 300 g/L              | 0.103     | 1.02             | 0.093     | 235.1            | 3.74             | 0.976                           | 41.3         | 5.45             |
| Glycerol:            |           |                  |           |                  |                  |                                 |              |                  |
| 0 g/L                | 0.099     | 1.06             | 0.114     | 16.57            | 3.98             | 0.883                           | 36.2         | 5.78             |
| 340 g/L              | 0.105     | 1.36             | 0.121     | 44.35            | 3.71             | 0.713                           | 33.7         | 5.80             |
| 480 g/L              | 0.105     | 1.36             | 0.128     | 63.24            | 3.58             | 0.719                           | 32.5         | 5.80             |
| 620 g/L              | 0.105     | 1.48             | 0.133     | 90.65            | 3.44             | 0.665                           | 30.7         | 5.83             |
| 760 g/L              | 0.107     | 1.93             | 0.142     | 185.01           | 3.28             | 0.513                           | 26.9         | 5.98             |

**Table (S7):** A summary of the energy-transfer efficiencies of the five hetero-FRET probes in Ficoll-70 and glycerol solutions (in PBS). The Forster distances used in the energy transfer efficiency calculations are also shown, which were calculated based on the steady-state spectroscopy in different environments.

| Environment<br>(PBS) | <b>GE</b> | <b>G18</b> | <b>E6</b> | <b>E6G2</b> | <b>G12</b> | <b>R<sub>0</sub></b><br>(nm) |
|----------------------|-----------|------------|-----------|-------------|------------|------------------------------|
| Ficoll:              |           |            |           |             |            |                              |
| 0 g/L                | 14.0      | 32.4       | 20.5      | 19.3        | 36.2       | 5.26                         |
| 100 g/L              | 17.3      | 36.1       | 23.1      | 20.9        | 37.5       | 5.24                         |
| 200 g/L              | 20.2      | 36.6       | 26.4      | 24.8        | 39.3       | 5.21                         |
| 300 g/L              | 20.2      | 38.5       | 28.9      | 28.2        | 41.3       | 5.14                         |
| Glycerol:            |           |            |           |             |            |                              |
| 0 g/L                | 14.0      | 32.4       | 20.5      | 19.3        | 36.2       | 5.26                         |
| 340 g/L              | 11.4      | 30.2       | 18.6      | 16.5        | 33.7       | 5.19                         |
| 480 g/L              | 10.9      | 32.4       | 17.2      | 16.4        | 32.5       | 5.14                         |
| 620 g/L              | 10.4      | 30.9       | 17.8      | 15.7        | 30.7       | 5.09                         |
| 760 g/L              | 9.0       | 28.4       | 16.2      | 14.1        | 26.9       | 5.06                         |

**Table S8:** Fitting parameters of the time-resolved anisotropy for all constructs in PBS (pH 7.4) under 425 nm excitation and 531/40 nm detection. The angle ( $\theta$ ) between the absorbing and emitting dipoles is also calculated using the initial anisotropy. The corresponding apparent energy transfer efficiencies ( $E$ ) and donor-acceptor distances ( $R_{DA}$ ) are also shown.

| $\lambda_x - \lambda_{fl}$ : | $\beta_1$ | $\varphi_1$ | $\beta_2$ | $\varphi_2$ | $r_0$ | $\theta$ | $E$   | $R_{DA}$ |
|------------------------------|-----------|-------------|-----------|-------------|-------|----------|-------|----------|
| Probe                        |           | (ns)        |           | (ns)        |       |          |       | (nm)     |
| <b>425 – 531/40:</b>         |           |             |           |             |       |          |       |          |
| <b>GE</b>                    | 0.055     | 1.70        | 0.212     | 18.1        | 0.267 | 47.3°    | 14.0% | 7.12     |
| <b>E6G2</b>                  | 0.068     | 1.28        | 0.194     | 18.8        | 0.262 | 47.6°    | 19.3% | 6.68     |
| <b>E6</b>                    | 0.074     | 1.47        | 0.184     | 18.0        | 0.258 | 47.8°    | 20.5% | 6.60     |
| <b>G18</b>                   | 0.092     | 1.06        | 0.129     | 16.2        | 0.221 | 49.7°    | 32.4% | 5.95     |
| <b>G12</b>                   | 0.099     | 1.06        | 0.114     | 16.6        | 0.213 | 50.1°    | 36.2% | 5.78     |

**Table S9:** Fitting parameters of time-resolved anisotropy of representative intact and cleaved E6 proteins in glycerol-enriched buffer at room temperature. The angle  $\theta$  between the absorbing and emitting dipoles is also calculated using the initial anisotropy. The corresponding donor-acceptor distances ( $R_{DA}$ ) is also shown based on the apparent energy transfer efficiencies.

| $\lambda_x - \lambda_{fl}$ : | $\beta_1$ | $\varphi_1$ | $\beta_2$    | $\varphi_2$ | $r_0$        | $R_{DA}$    |
|------------------------------|-----------|-------------|--------------|-------------|--------------|-------------|
| <b>425 – 531/40:</b>         |           | <b>(ns)</b> |              | <b>(ns)</b> |              | <b>(nm)</b> |
| <b>E6</b>                    |           |             |              |             |              |             |
| 340 g/L                      | 0.068     | 1.32        | 0.200        | 35.0        | 0.269        | 6.64        |
| 480 g/L                      | 0.072     | 1.90        | 0.200        | 64.5        | 0.272        | 6.68        |
| 620 g/L                      | 0.075     | 1.74        | 0.205        | 91.1        | 0.269        | 6.57        |
| 760 g/L                      | 0.075     | 2.23        | 0.202        | 183         | 0.277        | 6.66        |
| <b>Cleaved E6</b>            |           |             |              |             |              |             |
| 340 g/L                      | —         | —           | 0.287        | 37.2        | 0.287        | —           |
| 480 g/L                      | —         | —           | 0.290        | 57.1        | 0.290        | —           |
| 620 g/L                      | —         | —           | 0.291        | 108         | 0.291        | —           |
| 760 g/L                      | —         | —           | <b>0.294</b> | <b>172</b>  | <b>0.294</b> | —           |

**Table S10:** Fitting parameters of time-resolved anisotropy of representative intact and cleaved E6 probe in Ficoll-70 solutions. The angle ( $\theta$ ) between the absorbing and emitting dipoles is also calculated using the initial anisotropy. These were measured using the TCSPC technique with emission-polarization analysis of the acceptor.

| $\lambda_x - \lambda_{fl}$ : | $\beta_1$ | $\varphi_1$ | $\beta_2$    | $\varphi_2$ | $r_0$        | $\theta$     | $R_{DA}$ |
|------------------------------|-----------|-------------|--------------|-------------|--------------|--------------|----------|
| 425 – 531/40:                |           | (ns)        |              | (ns)        |              |              | (nm)     |
| <b>E6</b>                    |           |             |              |             |              |              |          |
| 100 g/L                      | 0.078     | 1.57        | 0.159        | 26.5        | 0.238        | 48.8°        | 6.40     |
| 200 g/L                      | 0.085     | 1.51        | 0.144        | 49.6        | 0.229        | 49.3°        | 6.18     |
| 300 g/L                      | 0.086     | 1.12        | 0.142        | 78.2        | 0.228        | 49.3°        | 5.97     |
| <b>Cleaved E6</b>            |           |             |              |             |              |              |          |
| 100 g/L                      | —         | —           | 0.278        | 21.9        | 0.278        | 46.7°        | —        |
| 200 g/L                      | —         | —           | 0.278        | 37.4        | 0.278        | 46.7°        | —        |
| 300 g/L                      | —         | —           | <b>0.276</b> | <b>48.6</b> | <b>0.276</b> | <b>46.8°</b> | —        |
